# Supplementary material for: Releasing 17.8 wt% H2 from lithium borohydride ammoniate
Source: Royal Society of Chemistry journal article supplement (doi:10.1039/c1ee01480c), 2011-01-01
Supplement: c1ee01480c.pdf [file c1ee01480c.pdf]

Electronic Supplementary Information for *Energy and Environmental Science*

Supplementary Information:

Releasing 17.8 wt % H<sub>2</sub> from Lithium Borohydride Ammoniate

---

**Table of Contents**

---

| Paragraph | Procedure of Synthesis                                                                                                                                                                                                                                                                                                   | P.2  |
|-----------|--------------------------------------------------------------------------------------------------------------------------------------------------------------------------------------------------------------------------------------------------------------------------------------------------------------------------|------|
| Fig. S1   | Room temperature XRD pattern of 2Li(NH <sub>3</sub> )BH <sub>4</sub> -MgCl <sub>2</sub> sample collected after heating at 90 °C for 5 min.                                                                                                                                                                               | p. 3 |
| Fig. S2   | NH <sub>3</sub> desorption at the equilibrium of liquid-state Li(NH <sub>3</sub> ) <sub>1.2</sub> BH <sub>4</sub> and Li(NH <sub>3</sub> ) <sub>1.4</sub> BH <sub>4</sub> samples as a function of temperature. Profile of Li(NH <sub>3</sub> ) <sub>4/3</sub> BH <sub>4</sub> upon heating to 200 °C was also included. | p. 5 |
| Fig. S3   | Hydrogen release from the Co-doped Li(NH <sub>3</sub> ) <sub>4/3</sub> BH <sub>4</sub> sample at a) 140 °C for 3 hours and b) 180 °C for 7 hours, respectively.                                                                                                                                                          | p. 6 |
| Fig. S4   | <sup>11</sup> B NMR spectrum of the solid residue collected after the Li(NH <sub>3</sub> ) <sub>4/3</sub> BH <sub>4</sub> sample dehydrogenated at 250 °C.                                                                                                                                                               | p. 7 |
| Fig. S5   | Room temperature XRD patterns of a) 2LiBH <sub>4</sub> -Li <sub>4</sub> BN <sub>3</sub> H <sub>10</sub> after held at 70 °C for 2 hours and then cooled to room temperature, b) Li <sub>2</sub> BNH <sub>6</sub> after held at 90 °C for 10 hours and then cooled to room temperature.                                   | p. 7 |

---

---

|         |                                                                                                                                                                                                                                          |      |
|---------|------------------------------------------------------------------------------------------------------------------------------------------------------------------------------------------------------------------------------------------|------|
| Fig. S6 | a) Volumetric release curve of the ball milled post-140 °C dehydrogenated Co-doped $\text{Li}(\text{NH}_3)_{4/3}\text{BH}_4$ sample, b) Temperature profile.                                                                             | p. 8 |
| Fig. S7 | TEM image of the Co-doped $\text{LiBH}_4$ sample after ball milling.                                                                                                                                                                     | p. 8 |
| Fig. S8 | Co K-edge XAFS spectra of $\text{CoCl}_2$ , metallic Co and Co-doped $\text{LiBH}_4$ sample after ball milling and the Co-doped $\text{Li}(\text{NH}_3)_{4/3}\text{BH}_4$ samples after dehydrogenation at 180 and 250 °C, respectively. | p. 9 |
|         | Calculation procedures of $\text{NH}_3$ contents remaining in the $\text{Li}(\text{NH}_3)_{1.2}\text{BH}_4$ and $\text{Li}(\text{NH}_3)_{1.4}\text{BH}_4$ samples as a function of temperature.                                          | p. 3 |

---

## 1. Procedure of Synthesis

The synthesis and volumetric apparatus were composed of  $\text{NH}_3$  vessel,  $\text{LiBH}_4$  vessel and a digital pressure gauge. Co- $\text{LiBH}_4$  (0.1046 g, 4.121 mmol) and  $\text{NH}_3$  (0.0939 g, 5.524 mmol) are stored in two vessels separately. To make  $\text{LiBH}_4/\text{NH}_3$  molar ratio  $3/4$ , the amount of  $\text{NH}_3$  in the vessel should be more than the theoretical value due to the  $\text{NH}_3$  equilibrium pressure of  $\text{LiBH}_4$  ammoniate.  $\text{NH}_3$  was gradually introduced to  $\text{LiBH}_4$  vessel at room temperature. After absorption, the  $\text{NH}_3$  vessel was weighed and the mass loss was the exact content of the  $\text{LiBH}_4$  ammoniate (usually should be  $\text{LiBH}_4/\text{NH}_3$  molar ratio  $3/4$ ). Then the volumetric release was conducted in the small  $\text{LiBH}_4$  vessel (6.7 ml), and the pressure change inside the volumetric apparatus was recorded by a digital pressure gauge (*J. Mater. Chem.* 2009, 19, 8426.).

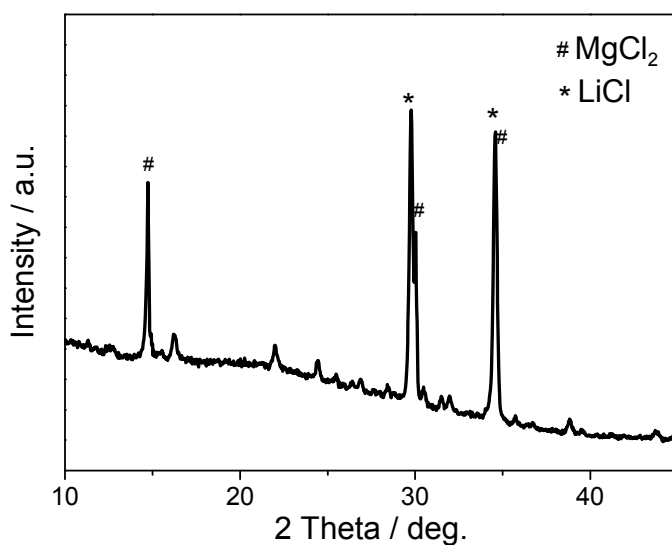

**Fig. S1** XRD patterns of  $2\text{Li}(\text{NH}_3)\text{BH}_4\text{-MgCl}_2$  sample collected after heating at  $90\text{ }^\circ\text{C}$  for 5 min.

The  $2\text{Li}(\text{NH}_3)\text{BH}_4\text{-MgCl}_2$  sample was prepared by mixing fresh  $\text{Li}(\text{NH}_3)\text{BH}_4$  with anhydrous  $\text{MgCl}_2$  in the molar ratio of 2:1, after hand milling for 5 min, the mixture was heated to  $90\text{ }^\circ\text{C}$  for 5 min in a sealed bottle and then cooled down slowly.<sup>1</sup>

**Calculation procedures of  $\text{NH}_3$  contents remaining in the  $\text{Li}(\text{NH}_3)_{1.2}\text{BH}_4$  and  $\text{Li}(\text{NH}_3)_{1.4}\text{BH}_4$  samples as a function of temperature:**

Since the Co-doped  $\text{Li}(\text{NH}_3)_{4/3}\text{BH}_4$  sample converts to liquid state at temperature around  $55\text{ }^\circ\text{C}$ , in addition, hydrogen evolution took place at ca.  $135\text{ }^\circ\text{C}$  and  $200\text{ }^\circ\text{C}$  (Fig. 1B) for the Co-doped and neat samples, respectively, therefore, our calculation of  $\text{NH}_3$  remaining in the sample as a function of temperature focused on temperatures above  $55\text{ }^\circ\text{C}$ . When the sample is put in a closed vessel, the amounts of  $\text{NH}_3$  released from the sample at given temperatures were calculated from the free volume of gas

and  $\text{NH}_3$  vapor pressure at equilibrium. By referencing to the previous work on pressure-composition-isothermal properties of  $\text{LiBH}_4\text{-NH}_3$  system,<sup>2</sup> the equilibrium pressure ( $P$ ) of  $\text{NH}_3$  at given temperature ( $T$ ) can be determined from Clausius-Clapeyron equation (Equation S1),

$$\log P(\text{mm}) = -A/T + B \quad (\text{S1})$$

where A and B were empirical constants determined by Sullivan and Johnson (shown in Table S1).<sup>2</sup> As there is no thermodynamic data available for the composite of  $\text{Li}(\text{NH}_3)_{4/3}\text{BH}_4$ ,<sup>[2]</sup> we calculated the temperature dependences of  $\text{NH}_3$  equilibrium pressure of the liquid-state  $\text{Li}(\text{NH}_3)_{1.2}\text{BH}_4$  and  $\text{Li}(\text{NH}_3)_{1.4}\text{BH}_4$ . Once the  $P$  and  $T$  are known, the specific numbers of  $\text{NH}_3$  can be determined through the Van der Waals equation (Equation S2) which takes into account the molecular stickiness and the molecular size of gas,<sup>3</sup> and the  $\text{NH}_3$  content detached in the gas phase (equiv.) and remaining in the vicinity of the sample (%) can be calculated from Equation S3 and S4, respectively,

$$\left(P + \frac{an^2}{V^2}\right)(V - nb) = nRT \quad (\text{S2})$$

$$\text{NH}_3(\text{Equiv.}) = \frac{n}{m} \quad (\text{S3})$$

$$\text{NH}_3(\%) = \left(1 - \frac{n}{c \times m}\right) \times 100\% \quad (\text{S4})$$

Where  $P$  is the pressure of the gas (atm),  $V$  the free volume of gas (L),  $n$  the number of moles,  $R$  the universal gas constant (0.08206 L·atm/(mol·K)),  $T$  the absolute temperature (K),  $a$  and  $b$  are the Van der Waals constants which reflect the attraction between the molecular particles and the volume of a mole of gas molecule at rest, respectively. For  $\text{NH}_3$ ,  $a$  and  $b$  are 4.170 L<sup>2</sup>·atm/mol<sup>2</sup> and 0.03707 L/mol, respectively.

$m$  is sample loading amount (mol) and  $c$  is the molar ratio of  $\text{NH}_3/\text{LiBH}_4$ , for  $\text{Li}(\text{NH}_3)_{1.2}\text{BH}_4$  or  $\text{Li}(\text{NH}_3)_{1.4}\text{BH}_4$ ,  $c$  is 1.2 or 1.4, respectively. The temperature-dependent equivalent numbers of  $\text{NH}_3$  release from  $\text{Li}(\text{NH}_3)_{1.2}\text{BH}_4$  and  $\text{Li}(\text{NH}_3)_{1.4}\text{BH}_4$  samples, and our  $\text{Li}(\text{NH}_3)_{4/3}\text{BH}_4$  sample heating to 200 °C were shown in Fig. S2, it can be seen that at temperatures below 200 °C the slight pressure increase in  $\text{Li}(\text{NH}_3)_{4/3}\text{BH}_4$  is probably due to  $\text{NH}_3$  release. Table S2 presents the percentage of  $\text{NH}_3$  remaining in the  $\text{Li}(\text{NH}_3)_{1.2}\text{BH}_4$  and  $\text{Li}(\text{NH}_3)_{1.4}\text{BH}_4$  samples at 55, 135 and 200 °C, the corresponding values for our  $\text{Li}(\text{NH}_3)_{4/3}\text{BH}_4$  sample should be in-between.

**Table S1.** Values of A, B for  $\text{Li}(\text{NH}_3)_{1.2}\text{BH}_4$  and  $\text{Li}(\text{NH}_3)_{1.4}\text{BH}_4$  samples.

| Sample                                    | A    | B     |
|-------------------------------------------|------|-------|
| $\text{Li}(\text{NH}_3)_{1.2}\text{BH}_4$ | 2415 | 8.709 |
| $\text{Li}(\text{NH}_3)_{1.4}\text{BH}_4$ | 2276 | 8.528 |

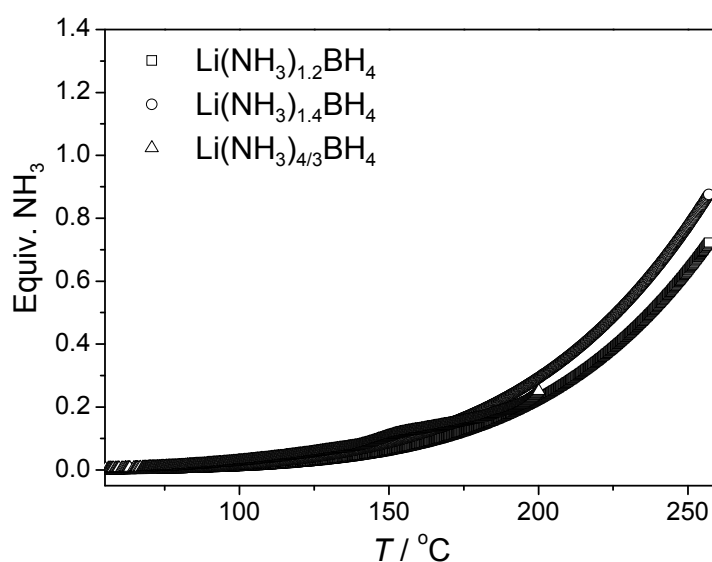

**Fig. S2** Temperature-dependent  $\text{NH}_3$  desorption at the equilibrium of liquid-state  $\text{Li}(\text{NH}_3)_{1.2}\text{BH}_4$  and  $\text{Li}(\text{NH}_3)_{1.4}\text{BH}_4$  samples. Profile of the  $\text{Li}(\text{NH}_3)_{4/3}\text{BH}_4$  sample upon

heating to 200 °C was also included.

**Table S2.** Percentage of NH<sub>3</sub> remaining in Li(NH<sub>3</sub>)<sub>1.2</sub>BH<sub>4</sub> and Li(NH<sub>3</sub>)<sub>1.4</sub>BH<sub>4</sub> at varied temperatures

| Sample                                              | 55 °C | 135 °C | 200 °C |
|-----------------------------------------------------|-------|--------|--------|
| Li(NH <sub>3</sub> ) <sub>1.2</sub> BH <sub>4</sub> | 99.9% | 96.7%  | 81.2%  |
| Li(NH <sub>3</sub> ) <sub>1.4</sub> BH <sub>4</sub> | 99.8% | 95.9%  | 79.1%  |

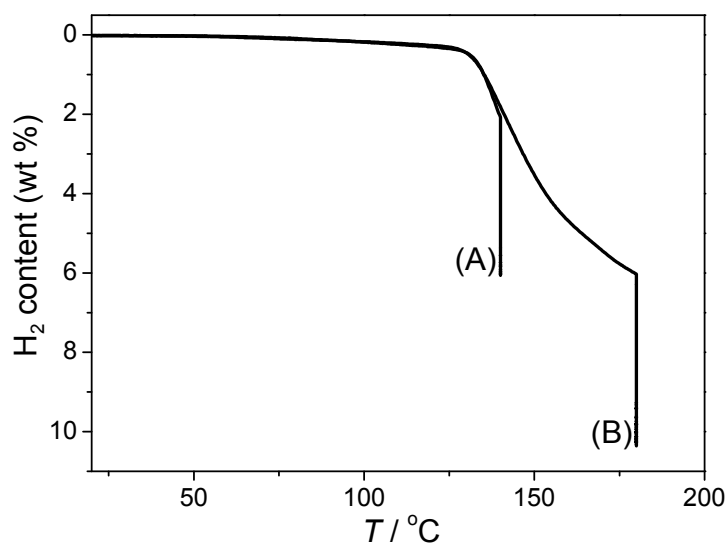

**Fig. S3** Hydrogen release from the Co-doped Li(NH<sub>3</sub>)<sub>4/3</sub>BH<sub>4</sub> sample at (A) 140 °C for 3 hours and (B) 180 °C for 7 hours, respectively.

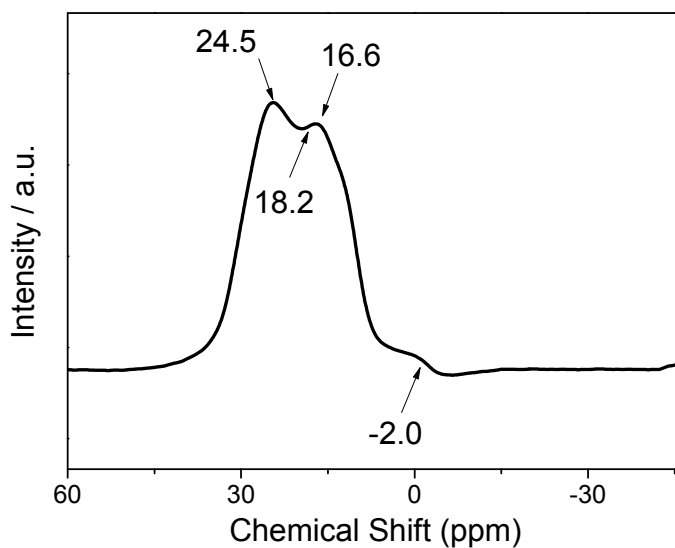

**Fig. S4**  $^{11}\text{B}$  NMR spectrum of the solid residue collected after the  $\text{Li}(\text{NH}_3)_{4/3}\text{BH}_4$  sample dehydrogenated at 250 °C.

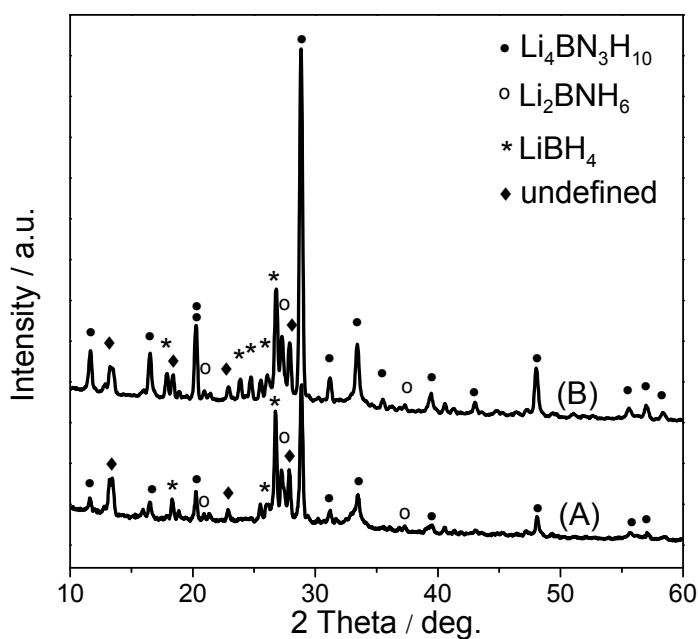

**Fig. S5** Room temperature XRD patterns of (A)  $2\text{LiBH}_4\text{-Li}_4\text{BN}_3\text{H}_{10}$  after held at 70 °C for 2 hours and then cooled to room temperature, (B)  $\text{Li}_2\text{BNH}_6$  after held at 90 °C for 10 hours and then cooled to room temperature.

In both cases,  $\text{Li}_2\text{BNH}_6$  could be observed after the samples were cooled to room

temperature, which evidences the recombination of  $\text{Li}_4\text{BN}_3\text{H}_{10}$  and  $\text{LiBH}_4$  to  $\text{Li}_2\text{BNH}_6$  during the sample cooling process is possible.

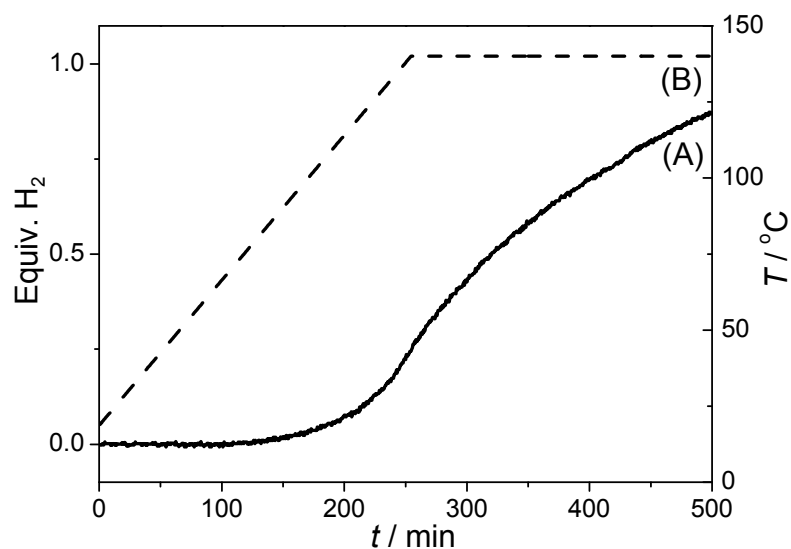

**Fig. S6** (A) Volumetric release curve of the ball milled post-140 °C dehydrogenated  $\text{Li}(\text{NH}_3)_{4/3}\text{BH}_4$  sample, (B) Temperature profile.

The post-140 °C dehydrogenated sample was ball milled at 200 rpm for 2 hours, and was heated to 140 °C at a heating rate of 0.5 °C/min.

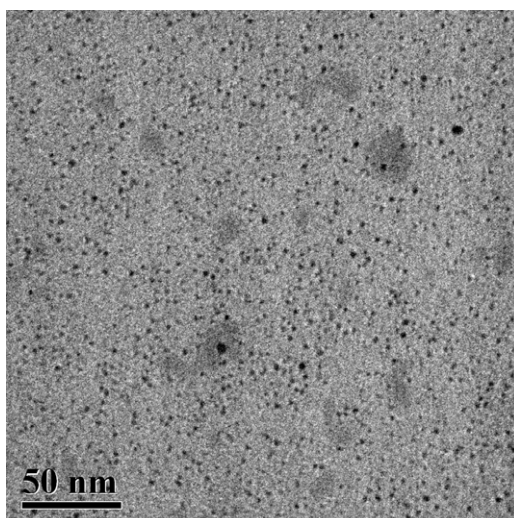

**Fig. S7** TEM image of the Co-doped  $\text{LiBH}_4$  sample after ball milling.



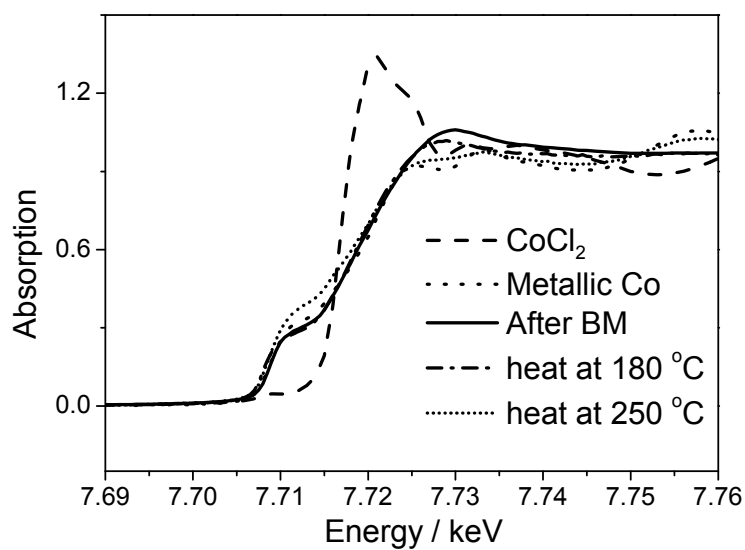

**Fig. S8** Co K-edge XAFS spectra of CoCl<sub>2</sub>, metallic Co and Co-doped LiBH<sub>4</sub> sample after ball milling and the Co-doped Li(NH<sub>3</sub>)<sub>4/3</sub>BH<sub>4</sub> samples after dehydrogenation at 180 and 250 °C, respectively.

### References

- 1 Y. H. Guo, G. L. Xia, Y. H. Zhu, L. Gao and X. B. Yu, *Chem. Commun.* **2010**, 46, 2599.
- 2 E. A. Sullivan and S. Johnson, *J. Phys. Chem.* **1959**, 63, 233.
- 3 R. G. Weast, *Handbook of Chemistry and Physics*, 62 ed., C.R.C. Press, **1982**.
